# Supplementary material
Source: PubMed Central journal article supplement (PMC6484951)
Supplement: jamacardiol-4-353-s001.pdf [file jamacardiol-4-353-s001.pdf]

## Supplementary Online Content

Modi ZJ, Lu Y, Ji N, et al. Risk of cardiovascular disease and mortality in young adults with end-stage renal disease: an analysis of the United States Renal Data System. *JAMA Cardiol*. Published online March 20, 2019. doi:10.1001/jamacardio.2019.0375

**eFigure.** Participation Flowchart

**eTable 1.** ICD-9 Codes Used for Cardiovascular Hospitalizations

**eTable 2.** Death Notification Form Cause of Death Codes Used for Cardiovascular Mortality

This supplementary material has been provided by the authors to give readers additional information about their work.

**eFigure 1.** Participation Flowchart

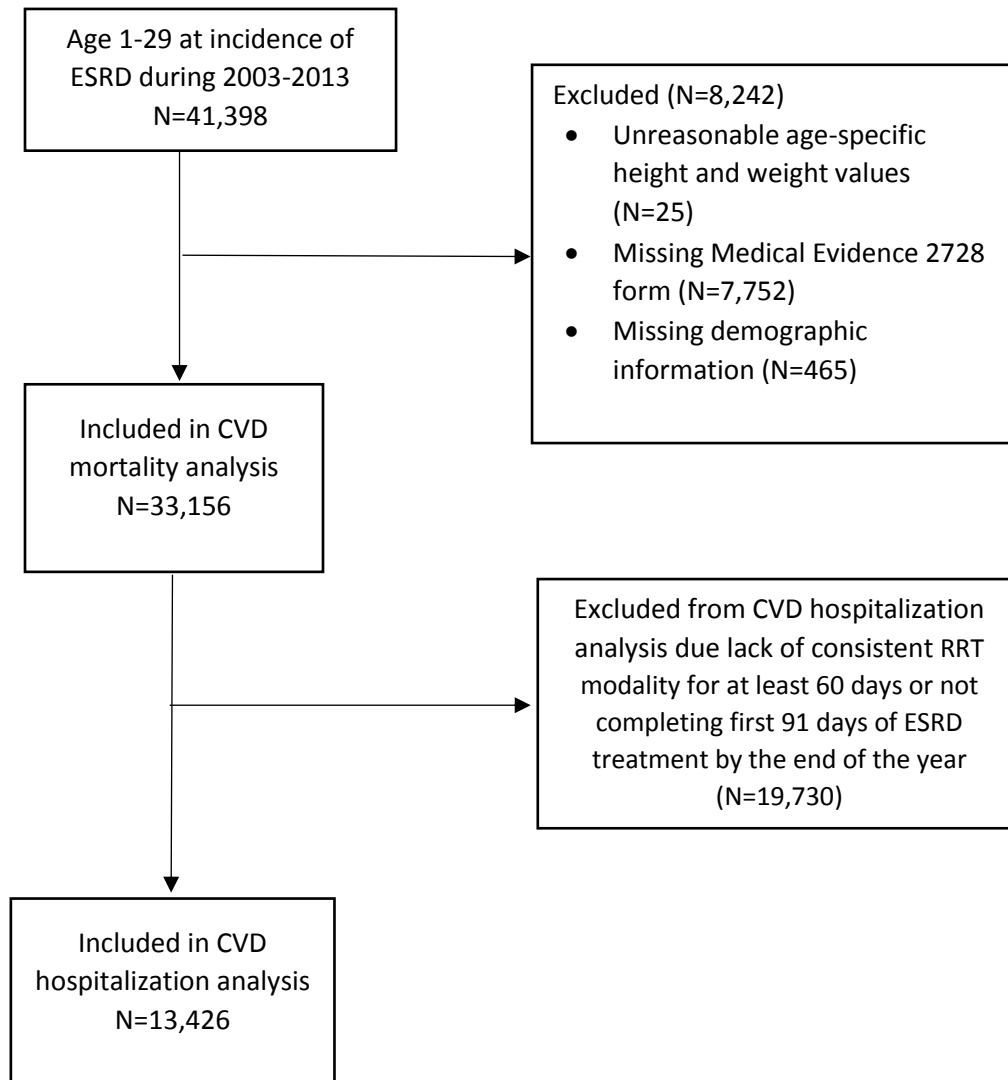

**eTable 1.** ICD-9 Codes Used for Cardiovascular Hospitalizations

| Diagnosis Groups                       | ICD-9 Diagnosis and Procedure Codes                                                                                                                                                                                                                                                                                                                                                                                                                                                                                                                                                                                                                                                                                                                                                                                                              |
|----------------------------------------|--------------------------------------------------------------------------------------------------------------------------------------------------------------------------------------------------------------------------------------------------------------------------------------------------------------------------------------------------------------------------------------------------------------------------------------------------------------------------------------------------------------------------------------------------------------------------------------------------------------------------------------------------------------------------------------------------------------------------------------------------------------------------------------------------------------------------------------------------|
| Coronary Artery Disease and Infarction | 410, 410.0, 410.1, 410.2, 410.3, 410.4, 410.5, 410.6, 410.7, 410.8, 410.9, 411, 411.0, 411.1, 411.8, 412, 413, 413.0, 413.1, 413.9, 414, 414.0, 414.01, 414.02, 414.05, 414.06, 414.07, 414.1, 414.10, 414.11, 414.12, 414.19, 414.2, 414.3, 414.4, 414.8, 414.9, 440, 440.1, 440.2, 440.21, 440.22, 440.23, 440.24, 440.29, 440.3, 440.4, 440.8, 440.9, 441, 441.0, 441.3, 441.4, 441.9, 442, 443.2, 443.21, 443.22, 443.23, 443.24, 443.29, 443.8, 443.9, 444, 445, 447.1, 447.2, 447.3, 447.5, 447.6, 447.7, 447.70, 447.71, 447.72, 447.73, 447.8, 447.9, 448, 448.0, 448.1, 448.9, 449, 429.2, 459.1, 459.10, 459.11, 459.12, 459.13, 459.19, 459.2, 459.3, 459.30, 459.31, 459.32, 459.33, 459.39, 459.8, 459.81, 459.89, 459.9, 429.7, 429.71, 429.79                                                                                     |
| Arrhythmia                             | 426, 426.0, 426.1, 426.10, 426.11, 426.12, 426.13, 426.3, 426.4, 426.5, 426.6, 426.7, 426.8, 426.9, 427, 427.0, 427.1, 427.2, 427.3, 427.31, 427.32, 427.4, 427.41, 427.5, 427.6, 427.8, 427.81, 427.89, 427.9                                                                                                                                                                                                                                                                                                                                                                                                                                                                                                                                                                                                                                   |
| Heart Failure                          | 404.03, 428, 428.0, 428.1, 428.20, 428.21, 428.22, 428.23, 428.30, 428.31, 428.32, 428.33, 428.40, 428.41, 428.42, 428.43, 428.9, 402.01, 402.11, 402.91, 404.13, 404.93, 398.91                                                                                                                                                                                                                                                                                                                                                                                                                                                                                                                                                                                                                                                                 |
| Non-Atherosclerotic Vascular Disease   | 442.0, 442.2, 442.3, 442.82, 444.21, 447.0, 430, 431, 432, 432.0, 432.1, 432.9, 433, 433.0, 433.1, 433.2, 433.3, 433.8, 433.9, 434.0, 434.00, 434.01, 434.1, 434.10, 434.11, 434.9, 435, 435.0, 435.1, 435.2, 435.3, 435.8, 435.9, 436, 437, 437.0, 437.1, 437.3, 437.4, 437.5, 437.6, 437.7, 437.8, 437.9, 438, 438.0, 438.1, 438.10, 438.11, 438.12, 438.13, 438.14, 438.19, 438.2, 438.20, 438.21, 438.22, 438.3, 438.4, 438.5, 438.8, 438.81, 438.82, 438.83, 438.84, 438.85, 438.9, 446, 446.1, 446.5, 443.82, 443.0, 443.1, 447.4                                                                                                                                                                                                                                                                                                          |
| Valve Disease                          | 394, 395, 396, 397, 391.1, 424.0, 424.1, 424.3, V433, 424.9, 421, 421.0                                                                                                                                                                                                                                                                                                                                                                                                                                                                                                                                                                                                                                                                                                                                                                          |
| Other                                  | 420, 420.9, 420.91, 422, 422.9, 422.91, 423, 425, 425.0, 425.1, 425.2, 425.3, 425.4, 425.5, 425.7, 425.8, 425.9, 429, 429.0, 429.1, 429.2, 429.3, 429.4, 429.5, 429.6, 429.8, 429.81, 429.82, 429.83, 429.89, 429.9, 416, 746.1, 746.2, 746.3, 746.4, 746.5, 746.6, 746.7, 746.8, 746.81, 746.82, 746.83, 746.84, 746.85, 746.86, 746.87, 746.89, 745, 745.0, 745.1, 745.10, 745.11, 745.12, 745.19, 745.2, 745.3, 745.4, 745.5, 745.6, 745.60, 745.61, 745.69, 745.7, 745.8, 745.9, 398.99, 398.0, 398.9, 398.90, 391.2, 391.8, 391.9, 391.0, 402.00, 402.10, 402.90, 404.02, 404.12, 404.92, 747, 747.0, 747.1, 471.0, 747.11, 747.2, 747.20, 747.21, 747.22, 747.29, 747.3, 747.31, 747.32, 747.39, 747.4, 747.40, 747.41, 747.42, 747.49, 747.5, 747.6, 747.60, 747.62, 747.63, 747.64, 747.69, 747.8, 747.81, 747.82, 747.83, 747.89, 747.9 |

**eTable 2.** Death Notification Form Cause of Death Codes Used for Cardiovascular Mortality

| Cause of Death Codes Included                                 |
|---------------------------------------------------------------|
| 23 Acute Myocardial Infarction                                |
| 25 Pericarditis, including Cardiac Tamponade                  |
| 26 Atherosclerotic Heart Disease                              |
| 27 Cardiomyopathy                                             |
| 28 Cardiac Arrhythmia                                         |
| 29 Cardiac Arrest                                             |
| 30 Valvular Heart Disease                                     |
| 32 Congestive Heart Failure                                   |
| 36 Cerebrovascular Accident including Intracranial Hemorrhage |
| 61 Cardiac Infection (Endocarditis)                           |
